# Supplementary material
Source: MDPI journal article supplement (https://www.mdpi.com/1424-8247/14/12/1314)
Supplement: s1 [file s1]

# Stable Luminescent Poly(Allylaminehydrochloride)-Templated Copper Nanoclusters for Selectively Turn-Off Sensing of Deferasirox in $\beta$ -Thalassemia Plasma

Hung-Ju Lin <sup>1</sup>, Chun-Chi Wang <sup>1,2,3,\*</sup>, Hwang-Shang Kou <sup>1</sup>, Cheng-Wei Cheng <sup>1</sup> and Shou-Mei Wu <sup>4,5,\*</sup>

<sup>1</sup> School of Pharmacy, College of Pharmacy, Kaohsiung Medical University, Kaohsiung 807, Taiwan; Weiting0825@gmail.com (H.-J.L.); kouhs@kmu.edu.tw (H.-S.K.); pharmacysniksam@yahoo.com.tw (C.-W.C.)

<sup>2</sup> Department of Medical Research, Kaohsiung Medical University Hospital, Kaohsiung 807, Taiwan

<sup>3</sup> Drug Development and Value Creation Research Center, Kaohsiung Medical University Hospital, Kaohsiung 807, Taiwan

<sup>4</sup> Department of Fragrance and Cosmetic Science, College of Pharmacy, Kaohsiung Medical University, Kaohsiung 807, Taiwan

<sup>5</sup> Taiwan Food and Drug Administration, Ministry of Health and Welfare, Taipei 11561, Taiwan

\* Correspondence: chunchi0716@kmu.edu.tw (C.-C.W.); shmewu@kmu.edu.tw (S.-M.W.); Tel.: +886-7-3121101 (C.-C.W.); +886-7-3121101 (S.-M.W.)

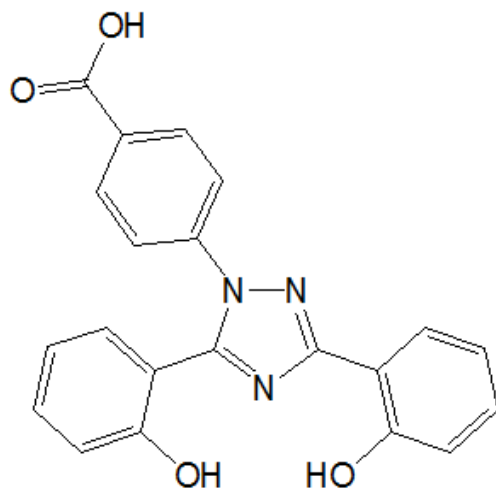

Figure S1. Chemical structure of deferasirox.

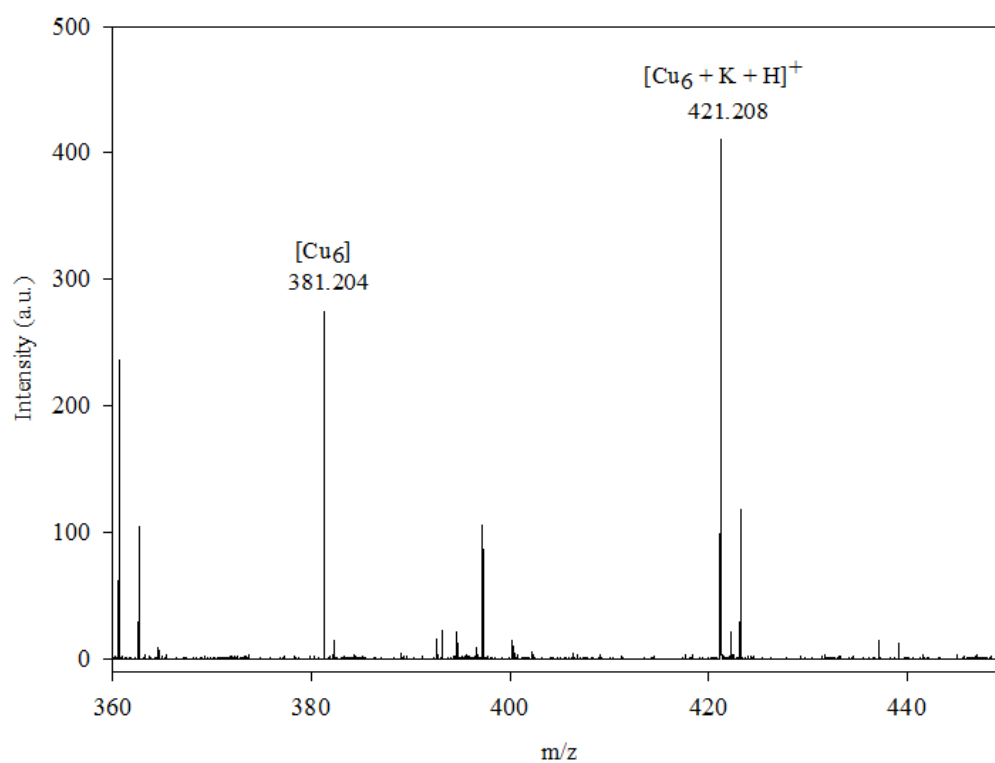

Figure S2. The MALDI-MS spectrum of PAH-Cu NCs.

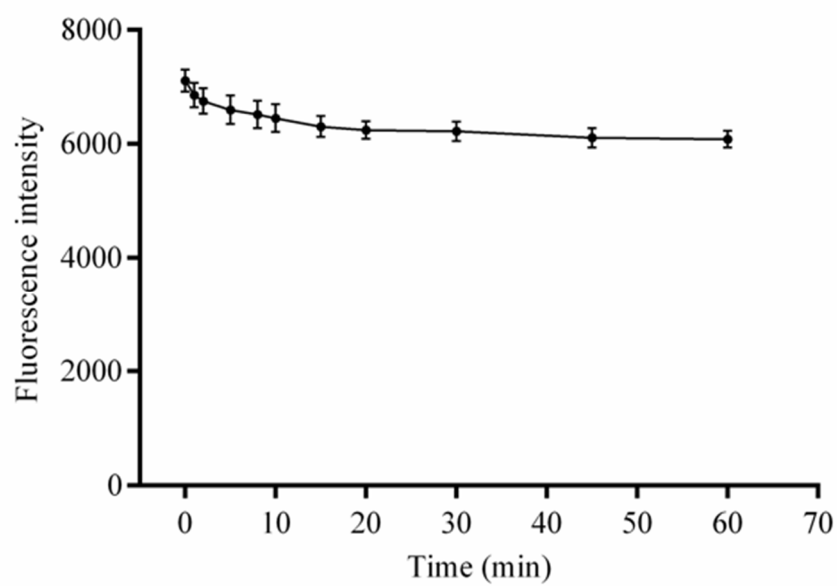

Figure S3. Fluorescent stability of the PAH-Cu NCs was evaluated for 60 min with continuously exposing at excitation source (360 nm).
